# Supplementary material
Source: PubMed Central journal article supplement (PMC3190113)
Supplement: cdd201148x1.pdf [file cdd201148x1.pdf]

## SUPPLEMENTARY TABLES

### Supplementary table S1

List of 80 EZH2 target genes expression profiles in HCT116 cells and MCF-7 cells treated with EZH2 siRNAs

| Accession      | Gene name | MCF7 NC | MCF7 EZH2 siRNA | HCT116 NC | HCT116 EZH2 siRNA |
|----------------|-----------|---------|-----------------|-----------|-------------------|
| NM_005502.2    | ABCA1     | 439.7   | 1574.5          | 418.7     | 1402.8            |
| NM_001124.1    | ADM       | 176.2   | 1189.6          | 159.6     | 998               |
| NM_001031615.1 | ALDH3B2   | 136.4   | 475.8           | 125       | 414.2             |
| NM_001647.2    | APOD      | 344.2   | 2703.2          | 298.6     | 2201.7            |
| NM_004316.2    | ASCL1     | 425.1   | 1527.9          | 384.1     | 1214.2            |
| NM_001165.3    | BIRC3     | 139.4   | 693.3           | 118.3     | 486.8             |
| NM_004335.2    | BST2      | 96.6    | 404.7           | 95.7      | 338.5             |
| NM_018381.2    | C19orf66  | 64      | 230.1           | 61.1      | 196.8             |
| NM_178496.2    | C3orf59   | 495.4   | 1825.9          | 451.6     | 1600.9            |
| NM_002985.2    | CCL5      | 93.8    | 1875.7          | 83.7      | 1528.2            |
| NM_001785.2    | CDA       | 85.6    | 327.8           | 92.7      | 314.7             |
| NM_004934.2    | CDH18     | 84.4    | 571             | 76.6      | 458.8             |
| NM_001710.4    | CFB       | 120.8   | 713.5           | 113.8     | 582.2             |
| NM_000495.3    | COL4A5    | 402.2   | 1411.8          | 359.6     | 1143.3            |
| NM_000308.2    | CTSA      | 507.5   | 1600.3          | 448.1     | 1427.1            |
| NM_014314.3    | DDX58     | 95.5    | 406.4           | 90.1      | 342.7             |
| NM_001999.3    | FBN2      | 88.8    | 333.9           | 82.4      | 269.1             |
| NM_148177.1    | FBXO32    | 223.4   | 792.6           | 211.3     | 643.7             |
| NM_198391.1    | FLRT3     | 323.1   | 1028            | 283.9     | 964.6             |
| NM_005252.2    | FOS       | 280.9   | 1141            | 245.6     | 887.8             |
| NM_006732.1    | FOSB      | 111.3   | 477.1           | 109.2     | 416.5             |
| NM_002510.2    | GPNMB     | 67.6    | 335.2           | 77        | 318.8             |
| NM_016323.2    | HERC5     | 162     | 1012.7          | 143.7     | 860.5             |
| NM_017912.3    | HERC6     | 125.6   | 965.2           | 115.1     | 669.9             |
| NM_003543.3    | HIST1H4H  | 368.8   | 1183.2          | 322.9     | 976.4             |
| NM_002116.5    | HLA-A     | 3035.3  | 10021.6         | 2527      | 9193.6            |
| NR_001434.1    | HLA-H     | 356.7   | 1296.2          | 327       | 1102.5            |
| NM_005532.3    | IFI27     | 79.3    | 8819.5          | 80.4      | 7603.8            |
| NM_005533.2    | IFI35     | 89.5    | 386.6           | 90.3      | 324.8             |
| NM_006417.3    | IFI44     | 56.6    | 339             | 61.9      | 289.3             |
| NM_022873.2    | IFI6      | 1471.9  | 17793.6         | 1311.4    | 14606.6           |
| NM_022168.2    | IFIH1     | 185.1   | 1338            | 184       | 1061.3            |
| NM_001548.3    | IFIT1     | 110.9   | 3869            | 106.3     | 3093.1            |
| NM_001031683.1 | IFIT3     | 55.2    | 522.2           | 51.2      | 454.1             |
| NM_003641.3    | IFITM1    | 184.2   | 1912.8          | 195       | 1586.3            |
| NM_006435.2    | IFITM2    | 2402.9  | 10454.9         | 2206.4    | 8910              |
| NM_021034.2    | IFITM3    | 1849.2  | 11695           | 1704.4    | 10286.7           |
| NM_000598.4    | IGFBP3    | 66.7    | 285.4           | 80.4      | 258.5             |
| NM_172140.1    | IL29      | 66.4    | 221.9           | 58.9      | 190.4             |
| NM_000584.2    | IL8       | 2057.7  | 6820.3          | 1705.4    | 5639.7            |

|                |          |       |        |        |        |
|----------------|----------|-------|--------|--------|--------|
| NM_006084.4    | IRF9     | 429.3 | 4591.4 | 412.2  | 3969.5 |
| NM_005101.1    | ISG15    | 944.4 | 8824.5 | 871.8  | 6357.9 |
| NM_002201.4    | ISG20    | 891.6 | 3550.5 | 816    | 3163.3 |
| NM_014732.2    | KIAA0513 | 211.4 | 823.9  | 187.3  | 617.8  |
| NM_016270.2    | KLF2     | 207.7 | 1055.8 | 192.6  | 920.7  |
| NM_198129.1    | LAMA3    | 86.5  | 301.9  | 75.3   | 253.4  |
| NM_005567.2    | LGALS3BP | 110   | 853.4  | 104.6  | 704.1  |
| NM_201589.2    | MAFA     | 139.6 | 555.2  | 134.3  | 543    |
| NM_007283.5    | MGLL     | 172.9 | 594.2  | 154.8  | 466.1  |
| NM_016816.2    | OAS1     | 59.8  | 215.2  | 59.2   | 201.1  |
| NM_016817.2    | OAS2     | 65.6  | 1310.8 | 66.6   | 1096.9 |
| NM_198213.1    | OASL     | 123.2 | 777.9  | 143.7  | 619.1  |
| NM_001008213.1 | OPTN     | 217.2 | 988.9  | 195.7  | 841.4  |
| NM_138821.1    | PAM      | 1455  | 5520.4 | 1313.3 | 4583.6 |
| NM_032789.1    | PARP10   | 58.8  | 229.6  | 59.9   | 202.8  |
| NM_022750.2    | PARP12   | 143.9 | 1159.3 | 126.2  | 987.6  |
| NM_017554.1    | PARP14   | 136.3 | 618.1  | 132.9  | 496.8  |
| NM_031458.1    | PARP9    | 145.9 | 585.8  | 142.1  | 506.9  |
| NM_173582.3    | PGM2L1   | 94    | 359.8  | 79.4   | 277.7  |
| NM_003706.1    | PLA2G4C  | 128   | 544    | 133.2  | 455.5  |
| NM_033405.2    | PRIC285  | 487.2 | 2077.8 | 464    | 1603.4 |
| NM_002864.1    | PZP      | 72.3  | 271.8  | 74.6   | 228.8  |
| NM_004585.3    | RARRES3  | 62.4  | 331.5  | 59.6   | 284.9  |
| NM_016084.3    | RASD1    | 96.3  | 419.1  | 97     | 329.4  |
| NM_002910.4    | RENBP    | 135   | 1217.4 | 120.3  | 985.8  |
| NM_002923.1    | RGS2     | 62.8  | 214.6  | 56.6   | 171.2  |
| NM_080657.4    | RSAD2    | 56.9  | 259.7  | 58.8   | 242.3  |
| NM_017654.2    | SAMD9    | 90.9  | 1467   | 79.1   | 1224.1 |
| NM_004510.2    | SP110    | 295.8 | 1954.3 | 238.9  | 1565.5 |
| NM_007315.2    | STAT1    | 393.7 | 1887.1 | 358    | 1492.5 |
| NM_000593.5    | TAP1     | 531.6 | 2606.8 | 499    | 2101.8 |
| NM_003190.3    | TAPBP    | 711.8 | 2403.2 | 617.3  | 2063.7 |
| NM_006287.4    | TFPI     | 121   | 485.3  | 103.1  | 355.1  |
| NM_018295.2    | TMEM140  | 142.8 | 842.6  | 129.4  | 723.4  |
| NM_005724.4    | TSPAN3   | 374.3 | 1441.8 | 358.6  | 1257.7 |
| NM_006398.2    | UBD      | 69    | 345.2  | 59     | 266.6  |
| NM_004223.3    | UBE2L6   | 120.5 | 2971   | 116.1  | 2629.1 |
| NM_024626.2    | VTCN1    | 67.8  | 215.2  | 57.8   | 180.6  |
| NM_024625.3    | ZC3HAV1  | 137.5 | 566.4  | 127.3  | 495.8  |
| NM_021035.2    | ZNFX1    | 415.7 | 1258.8 | 361.1  | 1091.6 |

**Table S2.** EZH2, FBXO32, FBXO31 expression array data in 24 pair of clinical colon tumor samples with matched normal colon mucosa.

| Patient No. | <i>EZH2</i> |       | <i>FBXO32</i> |        | <i>FBXO31</i> |        |
|-------------|-------------|-------|---------------|--------|---------------|--------|
|             | Normal      | Tumor | Normal        | Tumor  | Normal        | Tumor  |
| 1           | 60.2        | 234   | 739.8         | 1595.4 | 1181.6        | 1563.7 |
| 2           | 69.9        | 472.9 | 3640          | 356.1  | 2109.9        | 1746.8 |
| 3           | 27.1        | 80.2  | 619.2         | 577    | 1124.9        | 1119.2 |
| 4           | 34.9        | 46.8  | 1879.2        | 171    | 1219.1        | 640.6  |
| 5           | -4.7        | 185.6 | 1801.1        | 930.9  | 1760.7        | 1744.6 |
| 6           | 20          | 161.6 | 3929.5        | 307.8  | 2273.6        | 1912.1 |
| 7           | 15.7        | 546.7 | 1130.3        | 329.9  | 1202.3        | 2252.9 |
| 8           | 49.5        | 195.5 | 3364          | 692.6  | 2650.5        | 2416.7 |
| 9           | -0.9        | 385.3 | 5137.5        | 273.3  | 2187.5        | 2450.9 |
| 10          | 53.3        | 207.8 | 2464.8        | 399    | 1808.2        | 1442.3 |
| 11          | 60.2        | 152.8 | 1169.2        | 417.3  | 1266.3        | 1673.6 |
| 12          | 66.7        | 284.2 | 176.1         | 754    | 1263.2        | 2649.1 |
| 13          | 36.5        | 409.9 | 2190.1        | 436    | 1619.5        | 1773.5 |
| 14          | 39.6        | 419.4 | 1965.1        | 2439.8 | 1874.7        | 4072.3 |
| 15          | 14.4        | 324.6 | 6205.2        | 507.5  | 3066.6        | 3596.8 |
| 16          | -9.6        | 145.8 | 7567.9        | 830.8  | 3106.2        | 1721.7 |
| 17          | 12.9        | 179.1 | 2893.6        | 336.1  | 2057.9        | 1620.3 |
| 18          | 58          | 532.1 | 2942.3        | 457.4  | 2141.4        | 1543   |
| 19          | 50.2        | 415.8 | 4732.1        | 787.4  | 2832.7        | 1806.9 |
| 20          | 4           | 616.6 | 8484          | 626.1  | 3806.8        | 2335.2 |
| 21          | 20.5        | 561.3 | 5416.5        | 1117.8 | 2776.3        | 3510.6 |
| 23          | 42.1        | 280.6 | 3775.4        | 329.7  | 2377.4        | 3086.1 |
| 23          | 13.9        | 52    | 429.6         | 190.7  | 590.6         | 1585.3 |
| 24          | 37          | 121.7 | 2167.8        | 455.7  | 1458.4        | 2705.4 |

**Table S3,**

Primer sequences used for ChIP assay to detect EZH2 binding to FBXO32 promoter

| <b>Primers</b> | <b>Sequences</b>                                                 |
|----------------|------------------------------------------------------------------|
| <b>1</b>       | 5'-GCAGCTATACGAGGTAGGACTGGGG-3'<br>5'-TTGCAGTGAGCTGAGATCGCGC-3'  |
| <b>2</b>       | 5'-CACTAAACTCCTAAGACACAGCCC-3'<br>5'-TACCTTCAAATCAGATGGGG-3'     |
| <b>3</b>       | 5'-CTAACACATCTGTGAGGTCAACGGG-3'<br>5'-TCTTGACAATGGGCTTGGCC-3'    |
| <b>4</b>       | 5'-ATCACATCCCTTAATTATGCAG-3'<br>5'-CAAAGAAATTGTGTGTGCC-3'        |
| <b>5</b>       | 5'-TTCACACAAATAGTTGTTGAAGGCC-3'<br>5'-TAAATGATGTACCCAGGGCC-3'    |
| <b>6</b>       | 5'-CAACGCTTGAGATCCTCTCCGC-3'<br>5'-TCTTCACCCAGTTCTGCCCG-3'       |
| <b>7</b>       | 5'-AGTCATGACTGTGCCACTGCGC-3'<br>5'-AAACCACCTGATTCCAGCCC-3'       |
| <b>8</b>       | 5'-ATAGAGTGCACTCCGTTTCCAGGGG-3'<br>5'-AAGTCAACTGTGAGGTCAGGGGC-3' |
| <b>9</b>       | 5'-GATAAGCTTAAAGCAGGACCCC-3'<br>5'-TTAGGTTACTCATCCTGGGG-3'       |

. **Table S4. Targeting sequences of siRNAs**

| <b>EZH2 siRNAs</b>   | <b>Targeting sequences</b> |
|----------------------|----------------------------|
| siEZH2#1             | GACUCUGAAUGCAGUUGCU        |
| siEZH2#2             | CGGUGGGACUCAGAAGGCA        |
| <b>FBXO32 siRNAs</b> |                            |
| siFBXO32#1           | GUCACAUCCUUUCCUGGAA        |
| siFBXO32#2           | CUGGAUCCAGAAGAUUUA         |
